# Supplementary material
Source: publisher site journal article supplement (https://www.degruyterbrill.com/publication/isbn/9783110295641/downloadAsset/9783110295641_Inhaltsverzeichnis.pdf)
Supplement: Supplementary file 1 [file 9783110295641_Inhaltsverzeichnis.pdf]

# INHALT

## EINLEITUNG

|   |                                                                             |   |
|---|-----------------------------------------------------------------------------|---|
| 1 | Konstruktionsgrammatik des Deutschen: Gegenstand und Aufbau des Buches..... | 1 |
|---|-----------------------------------------------------------------------------|---|

## TEIL I: KONSTRUKTIONEN ALS SPRACHWISSENSCHAFTLICHER GEGENSTAND

|       |                                                                                      |    |
|-------|--------------------------------------------------------------------------------------|----|
| 2     | Auf dem Weg zu einem neuen Forschungsparadigma .....                                 | 7  |
| 2.1   | Grammatik als kognitives und soziales Phänomen .....                                 | 7  |
| 2.2   | Was sind Konstruktionen? .....                                                       | 9  |
| 2.2.1 | Konstruktionen als nicht-kompositionelle sprachliche Einheiten .....                 | 11 |
| 2.2.2 | Form- und Bedeutungsaspekte von Konstruktionen .....                                 | 13 |
| 2.2.3 | Konstruktionen als kognitive Gestalten .....                                         | 16 |
| 2.3   | Wozu Konstruktionen?.....                                                            | 17 |
| 2.3.1 | Konstruktionen als einheitliches und<br>allgemeines Format sprachlichen Wissens..... | 18 |
| 2.3.2 | Konstruktionen als Bedeutungsträger .....                                            | 20 |
| 2.3.3 | Konstruktionen als psychologisch<br>realistisches Format sprachlichen Wissens .....  | 26 |

## TEIL II: KONSTRUKTIONSGRAMMATISCHE ANSÄTZE UND METHODISCHE ZUGÄNGE

|     |                                                                                                                                     |    |
|-----|-------------------------------------------------------------------------------------------------------------------------------------|----|
| 3   | Zur Entstehung und Entwicklung der Konstruktionsgrammatik .....                                                                     | 31 |
| 4   | Konstruktionsgrammatische Theoriebildungen I:<br>kognitive, gebrauchsbasierte und typologische Aspekte .....                        | 38 |
| 4.1 | <i>Cognitive Construction Grammar</i> (Lakoff und Goldberg):<br>von „there“-Konstruktionen zu Argumentstruktur-Konstruktionen ..... | 39 |
| 4.2 | <i>Cognitive Grammar</i> (Langacker): Grammatik als kognitives Phänomen .....                                                       | 41 |
| 4.3 | <i>Radical Construction Grammar</i> (Croft):<br>die typologische Perspektive.....                                                   | 44 |
| 5   | Konstruktionsgrammatische Theoriebildungen II:<br>formal ausgerichtete Ansätze.....                                                 | 48 |
| 5.1 | <i>Berkeley Construction Grammar</i> (Fillmore und Kay):<br>von Idiomen zur Grammatiktheorie .....                                  | 50 |
| 5.2 | <i>Sign-Based Construction Grammar</i> (Sag, Kay, Michaelis et al.):<br>auf dem Weg zu einem integrativen Ansatz? .....             | 56 |
| 5.3 | <i>Embodied Construction Grammar</i> (Bergen, Chang et al.):<br>psycholinguistische und komputationelle Erweiterungen .....         | 59 |
| 5.4 | <i>Fluid Construction Grammar</i> (Steels et al.):<br>Roboter in der Interaktion .....                                              | 61 |

|     |                                           |    |
|-----|-------------------------------------------|----|
| 6   | Methoden                                  |    |
| 6.1 | Introspektiv-interpretative Verfahren     | 67 |
| 6.2 | Quantitative korpuslinguistische Methoden | 68 |
| 6.3 | Qualitative korpuslinguistische Methoden  | 71 |
| 6.4 | Experimentelle Zugänge                    | 73 |

### TEIL III: THEORETISCHE GRUNDLAGEN UND PERSPEKTIVEN

|     |                                                                                                                                                |     |
|-----|------------------------------------------------------------------------------------------------------------------------------------------------|-----|
| 7   | Konstruktionsgrammatik als Teil der Kognitiven Linguistik: die fünf K-Prinzipien<br>(dargestellt am Beispiel von idiomatischen Konstruktionen) | 77  |
| 8   | Basiskonzepte                                                                                                                                  | 90  |
| 8.1 | Das Lexikon-Grammatik-Kontinuum                                                                                                                | 90  |
| 8.2 | Konstruktionsnetzwerke: Vererbungshierarchien, Relationstypen<br>und die Idee eines „Konstruktikons“                                           | 95  |
| 8.3 | Das gebrauchsbasierte Modell: Frequenz,<br>Produktivität und Prototypikalität                                                                  | 102 |
| 9   | Konstruktionen und Konstruktionsbedeutungen im Sprachgebrauch                                                                                  | 110 |
| 9.1 | Goldbergs Strukturschema zur Darstellung von Konstruktionen                                                                                    | 112 |
| 9.2 | Zur internen Struktur der Konstruktion:<br>Differenzierungsmöglichkeiten im Anschluss an Croft?                                                | 116 |
| 9.3 | Frames und Konstruktionen: die FrameNet-Perspektive                                                                                            | 118 |
| 9.4 | Analyseperspektiven im Anschluss an von Polenz: Prädikations- und<br>Aussagerahmen als Dimensionen der Konstruktionsbedeutung?                 | 122 |
| 9.5 | Vorschlag für ein integriertes Modell                                                                                                          | 129 |
| 9.6 | Zwischenfazit: Konstruktionsbedeutungen als<br>Prädikationsrahmen und Aussagerahmentypen                                                       | 140 |

### TEIL IV: ANWENDUNGSBEREICHE

|      |                                                                                        |     |
|------|----------------------------------------------------------------------------------------|-----|
| 10   | Konstruktionsgrammatische Forschungen in der germanistischen Linguistik                | 143 |
| 10.1 | Konstruktionsgrammatik in der Syntaxforschung                                          | 144 |
| 10.2 | Sprachwandel und Konstruktionsgrammatik                                                | 150 |
| 10.3 | Konstruktionsgrammatische Ansätze in der Phraseologie                                  | 152 |
| 10.4 | Konstruktionen in der Interaktionalen Linguistik                                       | 156 |
| 10.5 | (Erst-)Spracherwerb konstruktionsgrammatisch                                           | 162 |
| 11   | Anwendungsbeispiel I: die lexikalisch-spezifische Konstruktion <i>Leonard abgeholt</i> | 165 |
| 11.1 | Kontext der Äußerung                                                                   | 165 |
| 11.2 | Syntaktische Perspektive                                                               | 167 |
| 11.3 | Perspektive der Interaktionalen Linguistik und des Spracherwerbs                       | 170 |
| 11.4 | Ergebnisse                                                                             | 171 |

|                                                                               |     |
|-------------------------------------------------------------------------------|-----|
| 12 Anwendungsbeispiel II: das Geräusch-als-Bewegung-Verb <i>rumpeln</i> ..... | 173 |
| 12.1 Korpusbasierte Analyse von Konstruktionsbedeutungen:                     |     |
| Sichtung der Korpusbelege .....                                               | 174 |
| 12.2 Analyse der Bedeutung und Form der Konstruktion .....                    | 177 |
| 12.3 Formseitige Beschreibung und Präzisierung der Konstruktion .....         | 179 |
| 12.5 Diskussion problematischer Fälle .....                                   | 181 |
| 12.5 Ergebnisse .....                                                         | 184 |

## TEIL V: SCHLUSSBEMERKUNGEN, BEGRIFFSGLOSSAR UND LÖSUNGSHINWEISE

|                                          |     |
|------------------------------------------|-----|
| 13 Fazit und Ausblick .....              | 187 |
| 14 Begriffsglossar .....                 | 193 |
| 15 Lösungshinweise zu den Aufgaben ..... | 204 |

## TEIL VI: VERZEICHNISSE

|                                                                                |     |
|--------------------------------------------------------------------------------|-----|
| 16 Abkürzungs-, Abbildungs- und Verzeichnis tabellarischer Darstellungen ..... | 209 |
| 16.1 Abkürzungen .....                                                         | 209 |
| 16.2 Abbildungen .....                                                         | 209 |
| 16.3 Tabellarische Darstellungen .....                                         | 210 |
| 17 Literatur .....                                                             | 212 |
| 17.1 Forschungsliteratur .....                                                 | 212 |
| 17.2 Verweise ins Internet .....                                               | 232 |
